# Supplementary material
Source: HighWire-hosted journal article supplement (https://bmjopen.bmj.com/content/12/1/e057650)
Supplement: inline-supplementary-material-1 [file inline-supplementary-material-1.pdf]

**SUPPLEMENTARY INFORMATION****Supplementary Table 1. Full search phrases used for MEDLINE and EMBASE on 4 August 2020**

| Ovid MEDLINE                                                                   | 2389 articles                                                                                |
|--------------------------------------------------------------------------------|----------------------------------------------------------------------------------------------|
| <b>Cervical spine concept</b>                                                  |                                                                                              |
| 1                                                                              | exp Cervical Vertebrae/ or exp Cervical Cord/ or cervical.tw                                 |
| <b>DCM concept</b>                                                             |                                                                                              |
| 2                                                                              | Exp Spinal Cord Diseases/ or Exp Spinal Diseases/                                            |
| 3                                                                              | degenerat*.tw                                                                                |
| 4                                                                              | 2 and 3                                                                                      |
| 5                                                                              | Myelopath*.tw                                                                                |
| 6                                                                              | Myeloradiculopath*.tw                                                                        |
| 7                                                                              | Radiculopath*.tw                                                                             |
| 8                                                                              | Exp Spinal Cord Compression/                                                                 |
| 9                                                                              | Exp "Ossification of the Posterior Longitudinal Ligament"/                                   |
| 10                                                                             | Ossification of the Posterior Longitudinal Ligament.tw                                       |
| 11                                                                             | OPLL.tw                                                                                      |
| 12                                                                             | Exp Spinal Stenosis/                                                                         |
| 13                                                                             | Cervical stenosis.tw                                                                         |
| 14                                                                             | Exp Spondylosis/                                                                             |
| 15                                                                             | Spondylosis.tw                                                                               |
| 16                                                                             | Spondylotic.tw                                                                               |
| 17                                                                             | Degenerative cervical myelopathy.tw                                                          |
| 18                                                                             | DCM.tw                                                                                       |
| 19                                                                             | Cervical spondylotic myelopathy.tw                                                           |
| 20                                                                             | CSM.tw                                                                                       |
| 21                                                                             | 4 or 5 or 6 or 7 or 8 or 9 or 10 or 11 or 12 or 13 or 14 or 15 or 16 or 17 or 18 or 19 or 20 |
| 22                                                                             | 1 and 21                                                                                     |
| <b>Tools for function concept (neurological/gait/mobility centric) concept</b> |                                                                                              |
| 23                                                                             | Japanese Orthopaedic Association score.tw                                                    |
| 24                                                                             | JOA.tw                                                                                       |
| 25                                                                             | modified JOA.tw                                                                              |
| 26                                                                             | mJOA.tw                                                                                      |
| 27                                                                             | Graded Redefined Assessment of Sensation Strength and Prehension.tw                          |
| 28                                                                             | GRASSP.tw                                                                                    |
| 29                                                                             | Quick Disability of the Arm Shoulder and Hand.tw                                             |
| 30                                                                             | QuickDASH.tw                                                                                 |

- 31 Myelopathy Disability Index.tw
- 32 MDI.tw
- 33 Nurick score.tw
- 34 Neck functional disability scale.tw
- 35 NFDS.tw
- 36 Neck Disability Index.tw
- 37 NDI.tw
- 38 Cooper myelopathy scale.tw
- 39 CMS.tw
- 40 European myelopathy score.tw
- 41 EMS.tw
- 42 Bournemouth questionnaire.tw
- 43 BQ.tw
- 44 Cervical spine outcomes questionnaire.tw
- 45 CSOQ.tw
- 46 Patient specific functional scale.tw
- 47 PSFS.tw
- 48 World Health Organization Quality of Life Instruments.tw
- 49 WHOQOL.tw
- 50 Grip and release test.tw
- 51 GRT.tw
- 52 Grip Dynamometer.tw
- 53 Triangle step test.tw
- 54 Foot tapping test.tw
- 55 30 m walking test.tw
- 56 30MWT.tw
- 57 10 m walking test.tw
- 58 10MWT.tw
- 59 Berg Balance Scale.tw
- 60 BBS.tw
- 61 GAITRite.tw
- 62 10 second step test.tw
- 63 9 hole peg test.tw
- 64 Prolo.tw
- 65 Mental component score.tw
- 66 MCS.tw
- 67 Physical component score.tw
- 68 PCS.tw

- 69 Hospital anxiety depression scale.tw  
 70 HADS.tw  
 71 Global rating of change.tw  
 72 GROCC.tw  
 73 23 or 24 or 25 or 26 or 27 or 28 or 29 or 30 or 31 or 32 or 33 or 34 or 35 or 36 or 37 or 38 or 39 or 40 or 41 or 42 or 43 or 44 or 45 or 46 or 47 or 48 or 49 or 50 or 51 or 52 or 53 or 54 or 55 or 56 or 57 or 58 or 59 or 60 or 61 or 62 or 63 or 64 or 65 or 66 or 67 or 68 or 69 or 70 or 71 or 72

#### Tools for QOL concept (including pain) concept

- 74 Exp "Quality of Life"/ or exp "Surveys and Questionnaires"/  
 75 Short Form Health Survey.tw  
 76 SF-36.tw  
 77 SF-12.tw  
 78 EQ-5D.tw  
 79 Japanese Orthopaedic Association Cervical Myelopathy Evaluation Questionnaire.tw  
 80 JOACMEQ.tw  
 81 Visual Analogue Scale.tw  
 82 VAS.tw  
 83 Likert scale.tw  
 84 Numeric pain rating scale.tw  
 85 NPRS.tw  
 86 North American Spine Satisfaction.tw  
 87 NASS.tw  
 88 74 or 75 or 76 or 77 or 78 or 79 or 80 or 81 or 82 or 83 or 84 or 85 or 86 or 87

#### Psychometric concept

- 89 Exp Psychometrics/  
 90 Pyschometr\*.tw  
 91 (cliniometr\* or clinometr\*).tw.  
 92 Outcome assessment\*.tw  
 93 exp Health Status Indicators/  
 94 Exp "Reproducibility of Results"/  
 95 Reproducib\*.tw  
 96 Exp Validation Study/  
 97 exp Discriminant Analysis/  
 98 (reliab\* or unreliab\* or valid\* or coefficient or homogeneity or homogeneous or internal consistency).tw  
 99 (cronbach\* and (alpha or alphas)).tw.  
 100 (item and (correlation\* or selection\* or reduction\*)).tw

- 101 (agreement or precision or imprecision or precise values or test–retest).tw
- 102 (reliab\* and (test or retest)).tw
- 103 (stability or interrater or inter-rater or intrarater or intra-rater or intertester or inter-tester or intratester or intra-tester or interobserver or inter-observer or intraobserver or intraobserver or intertechnician or inter-technician or intratechnician or intra-technician or interexaminer or inter-examiner or intraexaminer or intra-examiner or interassay or interassay or intraassay or intra-assay or interindividual or inter-individual or intraindividual or intra-individual or interparticipant or inter-participant or intraparticipant or intra-participant or kappa or kappas or repeatab\*).tw
- 104 ((replicab\* or repeated) and (measure or measures or findings or result or results or test or tests)).tw
- 105 (generaliza\* or generalisa\* or concordance).tw
- 106 (intraclass and correlation\*).tw
- 107 Exp Observer Variation/
- 108 Observer variation.tw
- 109 (multitrait and scaling and (analysis or analyses)).tw
- 110 Measurement error\*.tw
- 111 (item discriminant or interscale correlation\* or error or errors or individual variability).tw
- 112 (variability and (analysis or values)).tw
- 113 (uncertainty and (measurement or measuring)).tw
- 114 Exp Diagnostic Errors/
- 115 Exp Data accuracy/
- 116 Exp Dimensional Measurement Accuracy/
- 117 Accuracy.tw
- 118 ((minimal or minimally or clinical or clinically) and (important or significant or detectable) and (change or difference)).tw
- 119 Minimally clinically important difference\*.tw
- 120 MCID.tw
- 121 (small\* and (real or detectable) and (change or difference)).tw
- 122 (meaningful change or ceiling effect or floor effect or Item response model or IRT or Rasch or Differential item functioning or DIF or computer adaptive testing or item bank or cross-cultural equivalence).tw
- 123 Exp Bias/ or exp Selection Bias/
- 124 Bias.tw
- 125 Exp “Predictive Value of Test”/

126 89 or 90 or 91 or 92 or 93 or 94 or 95 or 96 or 97 or 98 or 99 or 100 or 101 or 102 or 103 or 104 or 105 or 106 or 107 or 108 or 109 or 110 or 111 or 112 or 113 or 114 or 115 or 116 or 117 or 118 or 119 or 120 or 121 or 122 or 123 or 124 or 125

---

Combined concepts

---

127 73 or 88

128 22 and 126 and 127

---

**EMBASE**

**1550 articles**

---

Cervical spine concept

---

1 exp Cervical Vertebra/ or cervical spine/ or exp Cervical spinal cord/ or cervical.tw

---

DCM concept

---

2 Exp Spinal Cord Disease/ or Exp Spine Disease/

3 Exp degeneration/

4 degenerat\*.tw

5 3 or 4

6 2 and 5

7 Myelopath\*.tw

8 Myeloradiculopath\*.tw

9 Exp radiculopathy/

10 Radiculopath\*.tw

11 Exp Spinal Cord Compression/

12 Exp Posterior Longitudinal Ligament/ and exp ossification/

13 Ossification of the Posterior Longitudinal Ligament.tw

14 OPLL.tw

15 Exp vertebral canal stenosis/

16 Cervical stenosis.tw

17 Exp Cervical Spondylosis/

18 Exp Spondylosis/

19 Spondylosis.tw

20 Spondylotic.tw

21 Exp Cervical myelopathy/

22 Degenerative cervical myelopathy.tw

23 DCM.tw

24 Exp Cervical spondylotic myelopathy/

25 Cervical spondylotic myelopathy.tw

26 CSM.tw

27 6 or 7 or 8 or 9 or 10 or 11 or 12 or 13 or 14 or 15 or 16 or 17 or 18 or 19 or 20 or 21 or 22 or 23 or 24 or 25 or 26

28 1 and 27

Tools for function concept (neurological/gait/mobility centric) concept

- 29 Exp Japanese Orthopaedic Association score/  
30 Japanese Orthopaedic Association score.tw  
31 JOA.tw  
32 modified JOA.tw  
33 mJOA.tw  
34 Exp "Disabilities of the Arm, Shoulder and Hand (score)"/  
35 Graded Redefined Assessment of Sensation Strength and Prehension.tw  
36 GRASSP.tw  
37 Quick Disability of the Arm Shoulder and Hand.tw  
38 QuickDASH.tw  
39 Myelopathy Disability Index.tw  
40 MDI.tw  
41 Exp "Nurick (grade)"/  
42 Nurick score.tw  
43 Neck functional disability scale.tw  
44 NFDS.tw  
45 Exp Neck Disability Index/  
46 Neck Disability Index.tw  
47 NDI.tw  
48 Cooper myelopathy scale.tw  
49 CMS.tw  
50 European myelopathy score.tw  
51 EMS.tw  
52 Bournemouth questionnaire.tw  
53 BQ.tw  
54 Cervical spine outcomes questionnaire.tw  
55 CSOQ.tw  
56 Patient specific functional scale.tw  
57 PSFS.tw  
58 World Health Organization Quality of Life Instruments.tw  
59 WHOQOL.tw  
60 Grip and release test.tw  
61 GRT.tw  
62 Grip Dynamometer.tw  
63 Triangle step test.tw  
64 Foot tapping test.tw

- 65 30 m walking test.tw
- 66 30MWT.tw
- 67 10 m walking test.tw
- 68 10MWT.tw
- 69 Berg Balance Scale.tw
- 70 BBS.tw
- 71 GAITRite.tw
- 72 10 second step test.tw
- 73 9 hole peg test.tw
- 74 Prolo.tw
- 75 Mental component score.tw
- 76 MCS.tw
- 77 Physical component score.tw
- 78 PCS.tw
- 79 Hospital anxiety depression scale.tw
- 80 HADS.tw
- 81 Global rating of change.tw
- 82 GROC.tw
- 83 29 or 30 or 31 or 32 or 33 or 34 or 35 or 36 or 37 or 38 or 39 or 40 or 41 or 42 or 43 or 44 or 45 or 46 or 47 or 48 or 49 or 50 or 51 or 52 or 53 or 54 or 55 or 56 or 57 or 58 or 59 or 60 or 61 or 62 or 63 or 64 or 65 or 66 or 67 or 68 or 69 or 70 or 71 or 72 or 73 or 74 or 75 or 76 or 77 or 78 or 79 or 80 or 81 or 82

---

**Tools for QOL concept (including pain) concept**

---

- 84 Short Form Health Survey.tw
- 85 Exp Short Form 36/
- 86 SF-36.tw
- 87 Exp Short Form 12/
- 88 SF-12.tw
- 89 Exp "European Quality of Life 5 Dimensions questionnaire"/
- 90 EQ-5D.tw
- 91 Exp Japanese Orthopaedic Association Cervical Myelopathy Evaluation/
- 92 Japanese Orthopaedic Association Cervical Myelopathy Evaluation Questionnaire.tw
- 93 JOACMEQ.tw
- 94 Exp visual analog scale/
- 95 Visual Analogue Scale.tw
- 96 VAS.tw
- 97 Exp Likert scale/
- 98 Likert scale.tw

- 99 Numeric pain rating scale.tw  
 100 NPRS.tw  
 101 North American Spine Satisfaction.tw  
 102 NASS.tw  
 103 84 or 85 or 86 or 87 or 88 or 89 or 90 or 91 or 92 or 93 or 94 or 95 or 96 or 97 or 98 or 99  
 or 100 or 101 or 102

---

Psychometric concept

---

- 104 Exp Psychometry/  
 105 Pyschometr\*.tw  
 106 (clinimetr\* or clinometr\*).tw.  
 107 Outcome assessment\*.tw  
 108 exp Health Status Indicator/  
 109 Exp Reproducibility/  
 110 Reproducib\*.tw  
 111 Exp Validation Study/  
 112 exp Discriminant Analysis/  
 113 (reliab\* or unreliab\* or valid\* or coefficient or homogeneity or homogeneous or internal  
 consistency).tw  
 114 (cronbach\* and (alpha or alphas)).tw.  
 115 (item and (correlation\* or selection\* or reduction\*)).tw  
 116 (agreement or precision or imprecision or precise values or test–retest).tw  
 117 (reliab\* and (test or retest)).tw  
 118 (stability or interrater or inter-rater or intrarater or intra-rater or intertester or inter-tester or  
 intratester or intra-tester or interobserver or inter-observer or intraobserver or  
 intraobserver or intertechnician or inter-technician or intratechnician or intra-technician or  
 interexaminer or inter-examiner or intraexaminer or intra-examiner or interassay or  
 interassay or intraassay or intra-assay or interindividual or inter-individual or  
 intraindividual or intra-individual or interparticipant or inter-participant or intraparticipant or  
 intra-participant or kappa or kappas or repeatab\*).tw  
 119 ((replicab\* or repeated) and (measure or measures or findings or result or results or test  
 or tests)).tw  
 120 (generaliza\* or generalisa\* or concordance).tw  
 121 (intraclass and correlation\*).tw  
 122 Exp Observer Variation/  
 123 Observer variation.tw  
 124 (multitrait and scaling and (analysis or analyses)).tw  
 125 Measurement error\*.tw  
 126 (item discriminant or interscale correlation\* or error or errors or individual variability).tw



- 127 (variability and (analysis or values)).tw  
128 (uncertainty and (measurement or measuring)).tw  
129 Exp Diagnostic Error/  
130 Exp Data accuracy/  
131 Exp Dimensional Measurement Accuracy/  
132 ((minimal or minimally or clinical or clinically) and (important or significant or detectable) and (change or difference)).tw  
133 Minimally clinically important difference\*.tw  
134 MCID.tw  
135 (small\* and (real or detectable) and (change or difference)).tw  
136 (meaningful change or ceiling effect or floor effect or Item response model or IRT or Rasch or Differential item functioning or DIF or computer adaptive testing or item bank or cross-cultural equivalence).tw  
137 Exp Bias/ or exp Selection Bias/  
138 Bias.tw  
139 104 or 105 or 106 or 107 or 108 or 109 or 110 or 111 or 112 or 113 or 114 or 115 or 116 or 117 or 118 or 119 or 120 or 121 or 122 or 123 or 124 or 125 or 126 or 127 or 128 or 129 or 130 or 131 or 132 or 133 or 134 or 135 or 136 or 137 or 138

---

**Combined concepts**

- 140 83 or 103  
141 28 and 139 and 140
-

**Supplementary Table 2. Study characteristics**

| Study                 | Country                | Sample size | Psychometric properties                                                                                                                         | Outcome measures                                                       |
|-----------------------|------------------------|-------------|-------------------------------------------------------------------------------------------------------------------------------------------------|------------------------------------------------------------------------|
| Auffinger, Lall (1)   | United States          | 30          | MCID/SCB<br>Measurement error                                                                                                                   | NDI<br>VAS for pain<br>SF-36                                           |
| Augusto, Diniz (2)    | Brazil                 | 30          | Cross-cultural validity/Measurement invariance<br>Reliability<br>Responsiveness                                                                 | JOA<br>NDI                                                             |
| Azimi, Rezaei (3)     | Iran                   | 87          | Cross-cultural validity/Measurement invariance<br>Responsiveness                                                                                | JOACMEQ                                                                |
| Badhiwala, Witiw (4)  | Canada                 | 606         | MCID/SCB                                                                                                                                        | SF-36<br>mJOA<br>Nurick Scale<br>NDI                                   |
| Bohm, Fehlings (5)    | Multicenter/<br>Global | 601         | Reliability<br>Hypotheses testing for construct validity<br>Responsiveness                                                                      | Walking tests (timed or steps)<br>mJOA<br>Nurick Scale<br>NDI<br>SF-36 |
| Carreon, Glassman (6) | United States          | 505         | MCID/SCB                                                                                                                                        | NDI<br>SF-36<br>"Numeric rating scale" for pain                        |
| Chang, Kong (7)       | Korea                  | 108         | Reliability                                                                                                                                     | CT / CTM                                                               |
| Chiba, Kato (8)       | Japan                  |             | Reliability                                                                                                                                     | X-rays                                                                 |
| Chien, Lai (9)        | Taiwan                 | 45          | Responsiveness<br>MCID/SCB                                                                                                                      | JOACMEQ<br>NDI                                                         |
| Chiu and Pang (10)    | Hong Kong              | 72          | Internal consistency<br>Reliability<br>Content validity<br>Hypotheses testing for construct validity<br>Criterion validity<br>Measurement error | BBS<br>mJOA                                                            |

|                        |               |     | Responsiveness                                                                      |                                                                        |
|------------------------|---------------|-----|-------------------------------------------------------------------------------------|------------------------------------------------------------------------|
| Fukui, Chiba (11)      | Japan         | 368 | Content validity                                                                    | JOACMEQ                                                                |
| Fukui, Chiba (12)      | Japan         | 201 | Reliability                                                                         | JOACMEQ                                                                |
| Goyal, Murphy (13)     | United States | 118 | Responsiveness                                                                      | NDI<br>SF-12                                                           |
| Gwinn, Iannotti (14)   | United States | 20  | Reliability                                                                         | X-rays<br>Cobb's method                                                |
| Hosono, Sakaura (15)   | Japan         | 30  | Reliability<br>Criterion validity                                                   | Grip-and-release test<br>JOA                                           |
| Hosono, Takenaka (16)  | Japan         | 48  | Responsiveness                                                                      | Grip-and-release test<br>JOA                                           |
| Kang, Lee (17)         | Korea         | 82  | Reliability                                                                         | MRI (not DTI)                                                          |
| Kato, Oshima (18)      | Japan         | 92  | Measurement error<br>Hypotheses testing for construct validity<br>Responsiveness    | JOA<br>mJOA<br>JOACMEQ<br>NDI<br>SF-12                                 |
| Kato, Oshima (19)      | Japan         | 101 | Measurement error<br>Criterion validity<br>MCID/SCB                                 | JOA<br>Likert scale                                                    |
| Kato, Oshima (20)      | Japan         | 101 | Measurement error<br>Criterion validity<br>MCID/SCB                                 | JOACMEQ<br>NDI<br>EQ-5D<br>SF-36<br>Likert scale                       |
| King and Roberts (21)  | United States | 88  | Internal consistency                                                                | SF-36                                                                  |
| Ko, Choi (22)          | Korea         | 357 | Reliability                                                                         | MRI (not DTI)                                                          |
| Kopjar, Tetreault (23) | USA           | 277 | Responsiveness<br>Hypotheses testing for construct validity<br>Internal consistency | mJOA<br>Nurick Scale<br>NDI<br>SF-36<br>Walking tests (timed or steps) |
| Latimer, Haden (24)    | England       | 70  | Responsiveness                                                                      | SF-36<br>NDI                                                           |

|                           |               |     |                                                                                                                                                                            |                                                                                                                |
|---------------------------|---------------|-----|----------------------------------------------------------------------------------------------------------------------------------------------------------------------------|----------------------------------------------------------------------------------------------------------------|
|                           |               |     |                                                                                                                                                                            | VAS for pain<br>MDI                                                                                            |
| Longo, Berton (25)        | Italy         | 75  | Cross-cultural validity/Measurement invariance<br>Reliability<br>Internal consistency<br>Hypotheses testing for construct validity<br>Responsiveness<br>Criterion validity | mJOA<br>Nurick Scale<br>NDI<br>SF-36                                                                           |
| Lubelski, Alvin (26)      | United States | 119 | Hypotheses testing for construct validity<br>Responsiveness<br>Criterion validity                                                                                          | mJOA<br>Nurick Scale<br>EQ-5D                                                                                  |
| Mihara, Kondo (27)        | Japan         | 270 | Hypotheses testing for construct validity                                                                                                                                  | Grip-and-release test<br>Triangle step test                                                                    |
| Nakamoto, Oshima (28)     | Japan         | 94  | Internal consistency<br>Hypotheses testing for construct validity<br>Criterion validity                                                                                    | QuickDASH<br>JOA<br>NDI<br>SF-36<br>"Numeric rating scale" for pain                                            |
| Nakashima, Yukawa (29)    | Japan         | 101 | Hypotheses testing for construct validity                                                                                                                                  |                                                                                                                |
| Nicholson, Millhouse (30) | United States | 235 | Hypotheses testing for construct validity                                                                                                                                  | MRI (not DTI)<br>mJOA<br>NDI<br>SF-12<br>"Numeric rating scale" for pain<br>Isihara's Cervical Curvature Index |
| Nikaido, Kikuchi (31)     | Japan         | 87  | Hypotheses testing for construct validity)                                                                                                                                 | JOACMEQ<br>SF-36                                                                                               |
| Numasawa, Ono (32)        | Japan         | 126 | Hypotheses testing for construct validity<br>Responsiveness<br>Reliability                                                                                                 | JOA<br>Foot tapping test<br>Grip-and-release test                                                              |
| Olindo, Signate (33)      | France        | 40  | Reliability                                                                                                                                                                | 9-Hole peg test<br>MRI (not DTI)<br>Nurick Scale<br>mJOA<br>Walking tests (timed or steps)                     |

|                            |                |     |                                                              |                                                                                                             |
|----------------------------|----------------|-----|--------------------------------------------------------------|-------------------------------------------------------------------------------------------------------------|
| Park, Kim (34)             | Korea          | 100 | Reliability                                                  | MRI (not DTI)                                                                                               |
| Pratali, Smith (35)        | Brazil         |     | Cross-cultural validity                                      | mJOA                                                                                                        |
| Pratali, Smith (36)        | Brazil         | 55  | Reliability                                                  | mJOA                                                                                                        |
| Rhee, Shi (37)             | United States  | 100 | Criterion validity<br>Reliability<br>Content validity        | mJOA                                                                                                        |
| Sato, Horikoshi (38)       | Japan          | 66  | Hypotheses testing for construct validity                    | MRI (DTI)<br>JOA                                                                                            |
| Shim, Lee (39)             | Korea          | 79  | Reliability<br>Criterion validity                            | MRI (not DTI)                                                                                               |
| Singh and Crockard (40)    | England        | 100 | Internal consistency<br>Responsiveness                       | Odom's Criteria<br>Nurick Scale<br>Ranawat classification of disease severity<br>MDI<br>JOA<br>EMS<br>SF-36 |
| Singh and Crockard (41)    | United Kingdom | 41  | Hypotheses testing for construct validity                    | Walking tests (timed or steps)<br>MDI<br>Nurick Scale                                                       |
| Singh, Gnanalingham (42)   | England        | 105 | Internal consistency<br>Criterion validity<br>Responsiveness | SF-12<br>SF-36                                                                                              |
| Spurgas, Abbas (43)        | USA            | 35  | MCID/SCB                                                     | VAS for pain<br>NDI<br>SF-12<br>mJOA                                                                        |
| Tetreault, Nouri (44)      | Canada         | 755 | MCID/SCB                                                     | mJOA<br>NDI                                                                                                 |
| Thakar and Rajshekhar (45) | India          | 51  | MCID/SCB<br>Responsiveness                                   | VAS for pain<br>Nurick Scale<br>SF-36                                                                       |
| Thakar, Christopher (46)   | India          | 70  | Internal consistency<br>Criterion validity                   | WHOQOL-Bref<br>SF-36                                                                                        |

|                          |          |     |                                                                                                                                       |                                                |
|--------------------------|----------|-----|---------------------------------------------------------------------------------------------------------------------------------------|------------------------------------------------|
|                          |          |     | Responsiveness<br>MCID/SCB                                                                                                            | Nurick Scale                                   |
| Wada, Fukui (47)         | Japan    | 137 | Responsiveness                                                                                                                        | JOACMEQ<br>JOA<br>10-s step test               |
| Witayakom, Paholpak (48) | Thailand | 70  | Cross-cultural validity/Measurement<br>invariance<br>Reliability<br>Internal consistency<br>Hypotheses testing for construct validity | JOACMEQ<br>SF-36                               |
| Yonenobu, Abumi (49)     | Japan    | 29  | Reliability                                                                                                                           | JOA                                            |
| Yukawa, Kato (50)        | Japan    | 163 | Hypotheses testing for construct validity<br>Reliability<br>Criterion validity                                                        | 10-s step test<br>JOA<br>Grip-and-release test |
| Zhang, Zhou (51)         | China    | 142 | Internal consistency<br>Responsiveness<br>MCID/SCB                                                                                    | SF-36<br>mJOA                                  |
| Zhou, Zhang (52)         | China    | 113 | MCID/SCB<br>Measurement error                                                                                                         | mJOA<br>SF-36                                  |

**Supplementary Table 3. Interpretability (i.e., MCID and SCB).**

| <b>Instrument</b>                        | <b>Result summary</b>                       | <b>Overall rating</b> |
|------------------------------------------|---------------------------------------------|-----------------------|
| EQ-5D                                    | MCID: 0.05; total sample size: 101          | Sufficient            |
| JOA                                      | MCID: 2.5; total sample size: 101           | Sufficient            |
| JOACMEQ                                  |                                             |                       |
| Bladder function                         | MCID: 6.0; total sample size: 78            | Sufficient            |
| Cervical spine function                  | MCID: 2.5; total sample size: 179           | Sufficient            |
| Lower extremity function                 | MCID range 2.5–9.4; total sample size: 179  | Sufficient            |
| QOL                                      | MCID range 8.5–9.5; total sample size: 179  | Sufficient            |
| Upper extremity function                 | MCID range 2.5–13.0; total sample size: 179 | Sufficient            |
| mJOA                                     | MCID range 1.3–3.1; total sample size: 868  | Sufficient            |
|                                          | SCB: 14; total sample size: 35              | Indeterminate         |
| NDI                                      | MCID range 5–13; total sample size: 108     | Sufficient            |
|                                          | SCB range 9.5–36; total sample size: 65     | Indeterminate         |
| Pain, "Numeric rating scale" (Arm pain)  | MCID: 2.5; total sample size: 30            | Indeterminate         |
|                                          | SCB: 3.5; total sample size: 30             |                       |
| Pain, "Numeric rating scale" (Neck pain) | MCID: 2.5; total sample size: 30            | Indeterminate         |
|                                          | SCB: 3.5; total sample size: 30             |                       |
| SF-12                                    |                                             |                       |

|              |                                                                                |               |
|--------------|--------------------------------------------------------------------------------|---------------|
| MCS          | SCB: 51.5; total sample size: 35                                               | Indeterminate |
| PCS          | SCB: 30.1; total sample size: 35                                               | Indeterminate |
| <b>SF-36</b> |                                                                                |               |
| MCS          | MCID range 3.0–7.4; total sample size: 749                                     | Sufficient    |
| PCS          | "MCID range 3.9–9.6; total sample size: 890<br>SCB: 16; total sample size: 30" | Sufficient    |
| VAS for pain | MCID range 0.4–2.7; total sample size: 30                                      | Sufficient    |
|              | SCB: 1.1; total sample size: 30                                                | Indeterminate |



**Supplementary Table 4. Feasibility assessment.**

| <b>Tool</b>                                             | <b>Time (min)</b> | <b>Equipment</b> | <b>Training</b> | <b>License</b> | <b>Money</b> | <b>Ease of administration</b> | <b>Overall assessment</b> |
|---------------------------------------------------------|-------------------|------------------|-----------------|----------------|--------------|-------------------------------|---------------------------|
| 10-s step test                                          | 5                 | Minimal          | No              | No             | No           | Minimal barriers              | Minimal barriers          |
| 30MWT                                                   | 5                 | Minimal          | No              | No             | No           | Minimal barriers              | Minimal barriers          |
| 9-Hole peg test                                         | 5                 | Yes              | No              | No             | No           | Barriers                      | Barriers                  |
| Berg Balance Scale                                      | >15               | Yes              | Yes             | No             | No           | Barriers                      | Barriers                  |
| Cobb's method<br>(C2-C7)                                | 5                 | Minimal          | No              | No             | No           | Minimal barriers              | Minimal barriers          |
| CT<br>(Tsuyama's<br>classification, 2D &<br>3D)         | 5                 | Minimal          | No              | No             | No           | Minimal barriers              | Minimal barriers          |
| CT<br>(Tsuyama's<br>classification, lateral<br>+ axial) | 5                 | Minimal          | No              | No             | No           | Minimal barriers              | Minimal barriers          |
| EQ-5D<br>European                                       | 5                 | Minimal          | No              | Yes            | Yes          | Minimal barriers              | Minimal barriers          |
| Myelopathy Scale                                        | 5                 | Minimal          | No              | No             | No           | Minimal barriers              | Minimal barriers          |
| Foot tapping test                                       | 5                 | Minimal          | No              | No             | No           | Minimal barriers              | Minimal barriers          |
| Grip-and-release test                                   | 5                 | Minimal          | No              | No             | No           | Minimal barriers              | Minimal barriers          |
| Isihara's Cervical<br>Curvature Index                   | 5                 | Minimal          | No              | No             | No           | Minimal barriers              | Minimal barriers          |
| JOA                                                     | 5                 | No               | No              | No             | No           | No barriers                   | No barriers               |

|                                                                                                                     |      |         |    |    |    |                  |                  |
|---------------------------------------------------------------------------------------------------------------------|------|---------|----|----|----|------------------|------------------|
| JOACMEQ                                                                                                             | 5–15 | Minimal | No | No | No | Minimal barriers | Minimal barriers |
| MDI                                                                                                                 | 5    | Minimal | No | No | No | Minimal barriers | Minimal barriers |
| mJOA                                                                                                                | 5    | No      | No | No | No | No barriers      | No barriers      |
| MRI<br>(Depiction of<br>intramedullary<br>hyperintensity at<br>eight cervical disc<br>levels, T2W, 1.5-T or<br>3-T) | 5–15 | Minimal | No | No | No | Minimal barriers | Minimal barriers |
| MRI<br>(Kang's classification,<br>1.5-T or 3-T)                                                                     | 5    | Minimal | No | No | No | Minimal barriers | Minimal barriers |
| MRI<br>(Muhle's<br>classification, 1.5-T)                                                                           | 5    | Minimal | No | No | No | Minimal barriers | Minimal barriers |
| MRI<br>(Vaccaro's<br>classification, 1.5-T)                                                                         | 5    | Minimal | No | No | No | Minimal barriers | Minimal barriers |
| NDI                                                                                                                 | 5    | Minimal | No | No | No | Minimal barriers | Minimal barriers |
| Nurick scale                                                                                                        | 5    | Minimal | No | No | No | Minimal barriers | Minimal barriers |
| P-mJOA                                                                                                              | 5    | Minimal | No | No | No | Minimal barriers | Minimal barriers |

|                                                              |      |         |    |     |     |                  |                  |
|--------------------------------------------------------------|------|---------|----|-----|-----|------------------|------------------|
| Arm pain score                                               | 5    | No      | No | No  | No  | No barriers      | No barriers      |
| Neck pain score                                              | 5    | No      | No | No  | No  | No barriers      | No barriers      |
| QuickDASH                                                    | 5    | Minimal | No | Yes | Yes | Minimal barriers | Barriers         |
| Ranawat classification of disease severity                   | 5    | No      | No | No  | No  | No barriers      | No barriers      |
| SF-12                                                        | 5    | Minimal | No | Yes | Yes | Minimal barriers | Barriers         |
| SF-36                                                        | 5–15 | Minimal | No | Yes | Yes | Minimal barriers | Barriers         |
| Triangle step test                                           | 5    | Minimal | No | No  | No  | Minimal barriers | Minimal barriers |
| VAS for pain                                                 | 5    | Minimal | No | No  | No  | Minimal barriers | Minimal barriers |
| WHOQOL-Bref                                                  | 5–15 | Minimal | No | No  | No  | Minimal barriers | Minimal barriers |
| X-rays (Computer-assisted measurement of length & thickness) | 5–15 | Minimal | No | No  | No  | Minimal barriers | Minimal barriers |

**Supplementary Table 5. Content validity.**

| <b>Instrument</b> | <b>Result summary</b>                                                                                                                                                                                                               | <b>Overall rating</b> | <b>Quality of evidence</b> |
|-------------------|-------------------------------------------------------------------------------------------------------------------------------------------------------------------------------------------------------------------------------------|-----------------------|----------------------------|
| BBS               | Patient comprehensibility:<br>Item discrimination<br>index >0.589                                                                                                                                                                   | Indeterminate         | Very low                   |
| JOACMEQ           | Patient comprehensibility:<br>"No questions elicited<br>no answer or "I am not<br>sure" in more than 5%<br>of patients"                                                                                                             | Indeterminate         | Very low                   |
| P-mJOA            | Patient comprehensibility:<br>"In patients preferring<br>to complete the mJOA<br>them- selves, the most<br>popular answers were:<br>"ease of answering the<br>questions" (n = 33),<br>"understanding of the<br>questions" (n = 17)" | Indeterminate         | Very low                   |

**Supplementary Table 6. Internal consistency.**

| <b>Instrument</b>         | <b>Result summary</b>                                                | <b>Overall rating</b> | <b>Quality of evidence</b> |
|---------------------------|----------------------------------------------------------------------|-----------------------|----------------------------|
| BBS                       | Cronbach's alpha range 0.95–0.98; consistent; total sample size: 72  | Indeterminate         | Moderate                   |
| European Myelopathy Scale | Cronbach's alpha: 0.68; consistent; total sample size: 100           | Indeterminate         | Low                        |
| JOA                       | Cronbach's alpha: 0.72; consistent; total sample size: 100           | Indeterminate         | Low                        |
| JOACMEQ                   | Cronbach's alpha: 0.91; total sample size: 70                        | Indeterminate         | Moderate                   |
| Bladder function          | Cronbach's alpha range 0.77–0.78; consistent; total sample size: 157 | Indeterminate         | High                       |
| Cervical spine function   | Cronbach's alpha range 0.75–0.88; consistent; total sample size: 157 | Indeterminate         | High                       |
| QOL                       | Cronbach's alpha range 0.80–0.86; consistent; total sample size: 157 | Indeterminate         | High                       |
| Upper extremity function  | Cronbach's alpha range 0.72–0.74; consistent; total sample size: 157 | Indeterminate         | High                       |
| MDI                       | Cronbach's alpha: 0.92; consistent; total sample size: 100           | Indeterminate         | Low                        |
| mJOA                      | Cronbach's alpha range 0.60–0.63; consistent; total sample size: 352 | Indeterminate         | High                       |
| QuickDASH                 | Cronbach's alpha: 0.94; consistent; total sample size: 94            | Indeterminate         | Very low                   |
| SF-12                     | Cronbach's alpha: 0.77; consistent; total sample size: 105           | Indeterminate         | n/a                        |

---

|             |                                                                            |               |     |
|-------------|----------------------------------------------------------------------------|---------------|-----|
| SF-36       | Cronbach's alpha range<br>0.79–0.93; consistent;<br>total sample size: 473 | Indeterminate | n/a |
| WHOQOL-Bref | Cronbach's alpha range<br>0.86–0.87; consistent;<br>total sample size: 38  | Indeterminate | n/a |

---

n/a = No info available

**Supplementary Table 7. Cross-cultural validity.**

| <b>Instrument</b> | <b>Result summary</b>                                                                | <b>Overall rating</b> | <b>Quality of evidence</b> |
|-------------------|--------------------------------------------------------------------------------------|-----------------------|----------------------------|
| JOA               | Forward-backward translation [Brazilian Portuguese]<br>Comprehension rate:<br>>81.2% | Indeterminate         | Very low                   |
| JOACMEQ           | Forward-backward translation [Persian and Thai]<br>No info available                 | Indeterminate         | Very low                   |
| mJOA              | Forward-backward translation [Brazilian Portuguese and Italian]<br>No info available | Indeterminate         | Very low                   |

**Supplementary Table 8. Reliability.**

| <b>Instrument</b> | <b>Result summary</b>                                                                                                                                                                          | <b>Overall rating</b> | <b>Quality of evidence</b> |
|-------------------|------------------------------------------------------------------------------------------------------------------------------------------------------------------------------------------------|-----------------------|----------------------------|
| 10-s step test    | Test-retest stability:<br>Spearman's rank<br>correlation: 0.89; total<br>sample size: 163                                                                                                      | Indeterminate         | Low                        |
| 30MWT             | Test-retest stability:<br>Pearson's correlation<br>range 0.89–1.00; total<br>sample size: 16                                                                                                   | Indeterminate         | Very low                   |
| 9-Hole peg test   | Intra-observer reliability:<br>ICC range 0.97–0.98;<br>consistent; total<br>sample size: 41<br><br>Inter-observer reliability:<br>ICC range 0.97–0.99;<br>consistent; total<br>sample size: 41 | Sufficient            | Very low                   |
| BBS*              | Test-retest stability:<br>ICC: 0.99; total sample<br>size: 32<br><br>Inter-observer reliability:<br>ICC: 0.99; total sample<br>size: 32                                                        | Sufficient            | Very low                   |
|                   | Test-retest stability:<br>Kappa: 0.67; total<br>sample size: 32<br><br>Inter-observer reliability:<br>Kappa: 0.43; total<br>sample size: 32                                                    | Insufficient          | Very low                   |
| Cobb's method     | Intra-observer reliability:<br>ICC: 0.84; total sample<br>size: 20<br><br>Inter-observer reliability:<br>ICC: 0.77; total sample<br>size: 20                                                   | Sufficient            | Very low                   |
| CT                | Intra-observer reliability:                                                                                                                                                                    | Sufficient            | Moderate                   |



|                                                |                                                                                                                                                    |               |          |
|------------------------------------------------|----------------------------------------------------------------------------------------------------------------------------------------------------|---------------|----------|
| (Tsuyama's classification, 2D & 3D)            | Kappa range 0.85–0.86; consistent; total sample size: 108<br>Inter-observer reliability: Kappa range 0.71–0.76; consistent; total sample size: 108 |               |          |
| CT (Tsuyama's classification, lateral + axial) | Intra-observer reliability: Kappa: 0.67; total sample size: 108<br>Inter-observer reliability: Kappa: 0.51; total sample size: 108                 | Insufficient  | Moderate |
| Foot tapping test                              | Test–retest stability: Pearson's correlation range 0.90–0.93; total sample size: 126                                                               | Indeterminate | Low      |
| Grip-and-release test                          | Inter-observer reliability: ICC: 0.99; total sample size: 30                                                                                       | Sufficient    | Very low |
| JOA                                            | Inter-observer reliability: ICC: 0.81; total sample size: 29                                                                                       | Sufficient    | Very low |
| Bladder function                               | Intra-observer reliability: Kappa: 0.64; total sample size: 29<br>Inter-observer reliability: Kappa: 0.47; total sample size: 29                   | Insufficient  | Very low |
| Motor function of fingers                      | Intra-observer reliability: Kappa: 0.68; total sample size: 29<br>Inter-observer reliability: Kappa: 0.53; total sample size: 29                   | Insufficient  | Very low |
| Motor function of                              | Intra-observer reliability: Kappa: 0.50; total sample size: 29                                                                                     | Insufficient  | Very low |

|                                     |                                                                                                                                        |              |          |
|-------------------------------------|----------------------------------------------------------------------------------------------------------------------------------------|--------------|----------|
| shoulder and elbow                  | Inter-observer reliability:<br>Kappa: 0.31; total sample size: 29                                                                      |              |          |
| Motor function of lower extremity   | Intra-observer reliability:<br>Kappa: 0.55; total sample size: 29<br>Inter-observer reliability:<br>Kappa: 0.49; total sample size: 29 | Insufficient | Very low |
| Sensory function of lower extremity | Intra-observer reliability:<br>Kappa: 0.44; total sample size: 29<br>Inter-observer reliability:<br>Kappa: 0.34; total sample size: 29 | Insufficient | Very low |
| Sensory function of trunk           | Intra-observer reliability:<br>Kappa: 0.54; total sample size: 29<br>Inter-observer reliability:<br>Kappa: 0.58; total sample size: 29 | Insufficient | Very low |
| Sensory function of upper extremity | Intra-observer reliability:<br>Kappa: 0.51; total sample size: 29<br>Inter-observer reliability:<br>Kappa: 0.42; total sample size: 29 | Insufficient | Very low |
| <b>JOACMEQ</b>                      |                                                                                                                                        |              |          |
| Bladder function                    | Test-retest stability:<br>ICC: 0.62; total sample size: 70                                                                             | Insufficient | Very low |
| Cervical spine function             | Test-retest stability:<br>ICC: 0.63; total sample size: 70                                                                             | Insufficient | Very low |
| Lower extremity function            | Test-retest stability:<br>ICC: 0.93; total sample size: 70                                                                             | Sufficient   | Very low |
| QOL                                 | Test-retest stability:                                                                                                                 | Sufficient   | Very low |

|      |                                                                    |                                                                                                    |               |          |
|------|--------------------------------------------------------------------|----------------------------------------------------------------------------------------------------|---------------|----------|
|      |                                                                    | ICC: 0.83; total sample size: 70                                                                   |               |          |
|      | Upper extremity function                                           | Test-retest stability: ICC: 0.93; total sample size: 70                                            | Sufficient    | Very low |
| mJOA |                                                                    | Test-retest stability: Spearman's rank correlation: 0.91; total sample size: 75                    | Indeterminate | Very low |
|      |                                                                    | Intra-observer reliability: ICC: 0.87; total sample size: 55                                       | Sufficient    | Very low |
|      |                                                                    | Inter-observer reliability: ICC: 0.97; total sample size: 55<br>Kappa: 0.80; total sample size: 75 | Sufficient    | Low      |
|      | Motor dysfunction of lower extremities                             | Inter-observer reliability: ICC: 0.73; total sample size: 75                                       | Sufficient    | Low      |
|      | Motor dysfunction of upper extremities                             | Inter-observer reliability: ICC: 0.77; total sample size: 75                                       | Sufficient    | Low      |
|      | Sensory dysfunction of sphincter dysfunction                       | Inter-observer reliability: ICC: 0.78; total sample size: 75                                       | Sufficient    | Low      |
|      | Sensory dysfunction of upper extremities                           | Inter-observer reliability: ICC: 0.93; total sample size: 75                                       | Sufficient    | Low      |
| MRI  | (Depiction of intramedullary hyperintensity at eight cervical disc | Inter-observer reliability: Kendall's W range 0.72–0.78; total sample size: 79                     | Indeterminate | Very low |

|                                              |                                                                                                                                                                                                                                |              |          |
|----------------------------------------------|--------------------------------------------------------------------------------------------------------------------------------------------------------------------------------------------------------------------------------|--------------|----------|
| levels, T2W, 1.5-T or 3-T)                   |                                                                                                                                                                                                                                |              |          |
| MRI (Kang's classification, 1.5-T or 3-T)    | Intra-observer reliability: Kappa: 0.67; total sample size: 439<br>ICC: 0.77, total sample size: 82<br>Inter-observer reliability: Kappa range 0.60–0.93; total sample size: 539<br>ICC range 0.74–0.75; total sample size: 82 | Inconsistent | n/a      |
| MRI (Muhle's classification, 1.5-T)          | Intra-observer reliability: Kappa: 0.72; total sample size: 357<br>Inter-observer reliability: Kappa range 0.61; total sample size: 357                                                                                        | Inconsistent | n/a      |
| MRI (Vaccaro's classification, 1.5-T)        | Intra-observer reliability: Kappa: 0.71; total sample size: 357<br>Inter-observer reliability: Kappa range 0.69; total sample size: 357                                                                                        | Sufficient   | Moderate |
| P-mJOA                                       |                                                                                                                                                                                                                                |              |          |
| Motor dysfunction of lower extremities       | Inter-observer reliability: Kappa: 0.61; total sample size: 755                                                                                                                                                                | Insufficient | Moderate |
| Motor dysfunction of upper extremities       | Inter-observer reliability: Kappa: 0.66; total sample size: 755                                                                                                                                                                | Insufficient | Moderate |
| Sensory dysfunction of sphincter dysfunction | Inter-observer reliability: Kappa: 0.55; total sample size: 755                                                                                                                                                                | Insufficient | Moderate |

|                                                     |                                                                                                                                  |              |          |
|-----------------------------------------------------|----------------------------------------------------------------------------------------------------------------------------------|--------------|----------|
| Sensory dysfunction of upper extremities            | Inter-observer reliability:<br>Kappa: 0.55; total sample size: 755                                                               | Insufficient | Moderate |
| X-rays (Computer-assisted measurement of length)    | Intra-observer reliability:<br>ICC: 0.94; total sample size: 9<br>Inter-observer reliability:<br>ICC: 0.93; total sample size: 9 | Sufficient   | Very low |
| X-rays (Computer-assisted measurement of thickness) | Intra-observer reliability:<br>ICC: 0.96; total sample size: 9<br>Inter-observer reliability:<br>ICC: 0.97; total sample size: 9 | Sufficient   | Very low |

\*Result ratings for BBS were split by statistic used due to their associated differences in sufficiency.

**Supplementary Table 9. Measurement error.**

| <b>Instrument</b>              | <b>Result summary</b>                                                                                                                                    | <b>Overall rating</b> | <b>Quality of evidence</b> |
|--------------------------------|----------------------------------------------------------------------------------------------------------------------------------------------------------|-----------------------|----------------------------|
| BBS                            | MDC or SDC<br>Distribution: 1.5; total<br>sample size: 32                                                                                                | Indeterminate         | n/a                        |
| EQ-5D                          | MDC or SDC<br>Distribution: 0.13; total<br>sample size: 101<br>Anchor: 0.04; total<br>sample size: 101                                                   | Inconsistent          | n/a                        |
| JOA                            | MDC or SDC<br>Distribution: 1.0; total<br>sample size: 101<br>Anchor: 2.5; total<br>sample size: 101<br>LOA<br>1.2 (-1.2, 3.6); total<br>sample size: 92 | Sufficient            | Very low                   |
| JOACMEQ                        |                                                                                                                                                          |                       |                            |
| Bladder<br>function            | MDC or SDC<br>Distribution: 7.7; total<br>sample size: 101                                                                                               | Insufficient          | Very low                   |
| Cervical<br>spine<br>function  | MDC or SDC<br>Distribution: 12.9; total<br>sample size: 101<br>Anchor: 12.5; total<br>sample size: 101                                                   | Insufficient          | Very low                   |
| Lower<br>extremity<br>function | MDC or SDC<br>Distribution: 7.3; total<br>sample size: 101<br>Anchor: 9.4; total<br>sample size: 101                                                     | Inconsistent          | n/a                        |
| QOL                            | MDC or SDC<br>Distribution: 6.6; total<br>sample size: 101<br>Anchor: 8.5; total<br>sample size: 101                                                     | Sufficient            | Very low                   |

|                          |                                                                                                                                                                                                                      |                              |                  |
|--------------------------|----------------------------------------------------------------------------------------------------------------------------------------------------------------------------------------------------------------------|------------------------------|------------------|
| Upper extremity function | MDC or SDC<br>Distribution: 9.5; total sample size: 101<br>Anchor: 6.1; total sample size: 101                                                                                                                       | Sufficient                   | Very low         |
| mJOA                     | MDC or SDC<br>Distribution: 2.1; total sample size: 113<br>MCID range; total sample size: 868<br>Distribution: 1.2–1.4                                                                                               | Inconsistent<br>Sufficient   | Very low<br>High |
| NDI                      | MDC or SDC<br>Distribution: 6.2%; total sample size: 101<br>Anchor: 5.2%; total sample size: 101                                                                                                                     | Insufficient                 | Very low         |
| SF-36                    |                                                                                                                                                                                                                      |                              |                  |
| MCS                      | MDC or SDC<br>Distribution: 3.3–5.7; total sample size: 244<br>MCID; total sample size: 748<br>Distribution: 3.4–6.8                                                                                                 | Inconsistent<br>Inconsistent | n/a<br>n/a       |
| PCS                      | MDC or SDC<br>Distribution: 5.2–5.7; total sample size: 214<br>Anchor: 4.9; total sample size: 101<br>MCID range; total sample size: 861<br>Distribution: 2.9–5.5<br>MCID; total sample size: 51<br>Distribution: 10 | Inconsistent<br>Inconsistent | n/a<br>n/a       |
| VAS for pain             | MDC or SDC<br>Distribution: 3.1; total sample size: 30                                                                                                                                                               | Insufficient                 | Very low         |

|                    | MCID range 24.0–30.0;<br>total sample size: 51       | Insufficient  | Very low |
|--------------------|------------------------------------------------------|---------------|----------|
| <b>WHOQOL-Bref</b> |                                                      |               |          |
| PH                 | MCID<br>Distribution: 8.2; total<br>sample size: 38  | Indeterminate | n/a      |
| PS                 | MCID<br>Distribution: 7.9; total<br>sample size: 38  | Indeterminate | n/a      |
| SR                 | MCID<br>Distribution: 8.0; total<br>sample size: 38  | Indeterminate | n/a      |
| EN                 | MCID<br>Distribution: 5.6; total<br>sample size: 38  | Indeterminate | n/a      |
| PF                 | MCID<br>Distribution: 10.5; total<br>sample size: 38 | Indeterminate | n/a      |
| RP                 | MCID<br>Distribution: 17.2; total<br>sample size: 38 | Indeterminate | n/a      |
| BP                 | MCID<br>Distribution: 13.2; total<br>sample size: 38 | Indeterminate | n/a      |
| GH                 | MCID<br>Distribution: 12.3; total<br>sample size: 38 | Indeterminate | n/a      |
| VT                 | MCID<br>Distribution: 10.8; total<br>sample size: 38 | Indeterminate | n/a      |
| SF                 | MCID<br>Distribution: 13.6; total<br>sample size: 38 | Indeterminate | n/a      |
| RE                 | MCID<br>Distribution: 18.0; total<br>sample size: 38 | Indeterminate | n/a      |
| MH                 | MCID                                                 | Indeterminate | n/a      |



---

Distribution: 11.2; total  
sample size: 38

---

n/a = No info available

**Supplementary Table 10. Criterion validity.**

| Instrument                    | Result summary*                                                                                                                                                                   | Overall rating | Quality of evidence |
|-------------------------------|-----------------------------------------------------------------------------------------------------------------------------------------------------------------------------------|----------------|---------------------|
| 10-s step test                | JOA<br>Spearman's rank<br>correlation: 0.66; total<br>sample size: 163                                                                                                            | Insufficient   | High                |
| BBS                           | mJOA<br>AUC range 0.88–0.94;<br>total sample size: 31                                                                                                                             | Sufficient     | Low                 |
| Foot tapping test             | JOA<br>Pearson's correlation:<br>0.66; total sample size:<br>126<br>JOA MFLE<br>Pearson's correlation:<br>0.70; total sample size:<br>126                                         | Insufficient   | High                |
| Grip-and-release<br>test      | JOA<br>Pearson's correlation:<br>0.72; total sample size:<br>30                                                                                                                   | Sufficient     | Low                 |
| JOA                           | Likert scale, "Health<br>transition question"<br>AUC: 0.59; total<br>sample size: 101<br>Likert scale, "Patient<br>satisfaction question"<br>AUC: 0.62; total<br>sample size: 101 | Insufficient   | Very low            |
| JOACMEQ                       |                                                                                                                                                                                   |                |                     |
| Cervical<br>spine<br>function | Likert scale, "Health<br>transition question"<br>AUC: 0.58; total<br>sample size: 101<br>Likert scale, "Patient<br>satisfaction question"                                         | Insufficient   | Very low            |

|                                        |                                               |                                                                     |              |          |
|----------------------------------------|-----------------------------------------------|---------------------------------------------------------------------|--------------|----------|
|                                        |                                               | AUC: 0.58; total sample size: 101                                   |              |          |
| Upper extremity function               | Likert scale, "Health transition question"    | AUC: 0.66; total sample size: 101                                   | Insufficient | Very low |
|                                        | Likert scale, "Patient satisfaction question" | AUC: 0.65; total sample size: 101                                   |              |          |
| Lower extremity function               | Likert scale, "Health transition question"    | AUC: 0.61; total sample size: 101                                   | Insufficient | Very low |
|                                        | Likert scale, "Patient satisfaction question" | AUC: 0.66; total sample size: 101                                   |              |          |
| QOL                                    | Likert scale, "Health transition question"    | AUC: 0.70; total sample size: 101                                   | Insufficient | Very low |
|                                        | Likert scale, "Patient satisfaction question" | AUC: 0.66; total sample size: 101                                   |              |          |
| mJOA                                   | Nurick scale [convergent]                     | Spearman's rank correlation: -0.41; total sample size: 119          | Sufficient   | High     |
|                                        |                                               | Pearson's correlation range: -0.62 to -0.63; total sample size: 352 |              |          |
| Motor dysfunction of upper extremities | Nurick scale [convergent]                     | Pearson's correlation range -0.42 to -0.42; total sample size: 352  | Insufficient | High     |

|                                              |                                                                                                                                                                       |              |          |
|----------------------------------------------|-----------------------------------------------------------------------------------------------------------------------------------------------------------------------|--------------|----------|
| Motor dysfunction of lower extremities       | Nurick scale [convergent]<br>Pearson's correlation: -0.65 to -0.68; total sample size: 352                                                                            | Sufficient   | High     |
| Sensory dysfunction of upper extremities     | Nurick scale [convergent]<br>Pearson's correlation: -0.23; total sample size: 277                                                                                     | Insufficient | High     |
| Sensory dysfunction of sphincter dysfunction | Nurick scale [convergent]<br>Pearson's correlation: -0.25; total sample size: 277                                                                                     | Insufficient | High     |
| NDI                                          | Likert scale, "Health transition question"<br>AUC: 0.66; total sample size: 101<br>Likert scale, "Patient satisfaction question"<br>AUC: 0.75; total sample size: 101 | Inconsistent | n/a      |
| P-mJOA                                       | mJOA<br>Spearman's rank correlation: 0.83; total sample size: 755                                                                                                     | Sufficient   | High     |
| QuickDASH                                    | JOA MFSE<br>Spearman's rank correlation: -0.50; total sample size: 94<br>JOA SFUE<br>Spearman's rank correlation: -0.32; total sample size: 94                        | Insufficient | Moderate |
| SF-36                                        |                                                                                                                                                                       |              |          |
| PCS                                          | Likert scale, "Health transition question"<br>AUC: 0.67; total sample size: 101                                                                                       | Insufficient | Very low |

|                    |           |                                                                                    |              |     |
|--------------------|-----------|------------------------------------------------------------------------------------|--------------|-----|
|                    |           | Likert scale, "Patient satisfaction question"<br>AUC: 0.69; total sample size: 101 |              |     |
| <b>WHOQOL-Bref</b> |           |                                                                                    |              |     |
| PH                 | SF-36 PCS | Pearson's correlation:<br>0.51; total sample size:<br>38                           | Inconsistent | n/a |
|                    | SF-36 MCS | Pearson's correlation:<br>0.30; total sample size:<br>38                           |              |     |
| PS                 | SF-36 PCS | Pearson's correlation:<br>0.34; total sample size:<br>38                           | Insufficient | Low |
|                    | SF-36 MCS | Pearson's correlation:<br>0.23; total sample size:<br>38                           |              |     |
| SR                 | SF-36 PCS | Pearson's correlation:<br>0.35; total sample size:<br>38                           | Insufficient | Low |
|                    | SF-36 MCS | Pearson's correlation:<br>0.28; total sample size:<br>38                           |              |     |
| EN                 | SF-36 PCS | Pearson's correlation:<br>0.05; total sample size:<br>38                           | Insufficient | Low |
|                    | SF-36 MCS | Pearson's correlation:<br>0.03; total sample size:<br>38                           |              |     |

n/a = No info available

\*Instruments listed are comparators

**Supplementary Table 11. Construct validity.**

| Instrument     | Result summary*                                                                                                                                                                                                                                                                                                                 | Overall rating | Quality of evidence |
|----------------|---------------------------------------------------------------------------------------------------------------------------------------------------------------------------------------------------------------------------------------------------------------------------------------------------------------------------------|----------------|---------------------|
| 10-s step test | Grip-and-release test<br>[convergent]<br>Spearman's rank<br>correlation: 0.53; total<br>sample size: 163                                                                                                                                                                                                                        | Sufficient     | Moderate            |
| 30MWT          | mJOA [convergent]<br>Pearson's correlation:<br>-0.44; total sample<br>size: 16<br>MDI [convergent]<br>Spearman's rank<br>correlation: 0.65; total<br>sample size: 41<br>Nurick scale [convergent]<br>Pearson's correlation:<br>0.50; total sample size:<br>16<br>Spearman's rank<br>correlation: 0.61; total<br>sample size: 41 | Sufficient     | Moderate            |
|                | NDI<br>Pearson's correlation:<br>0.21; total sample size:<br>16                                                                                                                                                                                                                                                                 | Sufficient     | Low                 |
|                | SF-36 PCS<br>Pearson's correlation:<br>-0.35; total sample<br>size: 16                                                                                                                                                                                                                                                          | Sufficient     | Low                 |
|                | SF-36 MCS<br>Pearson's correlation:<br>-0.20; total sample<br>size: 16                                                                                                                                                                                                                                                          | Sufficient     | Low                 |
| BBS            | mJOA [convergent]<br>Spearman's rank<br>correlation: 0.81; total<br>sample size: 72                                                                                                                                                                                                                                             | Sufficient     | Moderate            |

|                                       |                                                                                                                  |              |      |
|---------------------------------------|------------------------------------------------------------------------------------------------------------------|--------------|------|
| EQ-5D                                 | mJOA<br>AUC: 0.68; total<br>sample size: 119<br>Nurick scale<br>AUC: 0.61; total<br>sample size: 119             | Insufficient | High |
| Foot tapping test                     | Grip-and-release test<br>[convergent]<br>Pearson's correlation:<br>0.58; total sample size:<br>126               | Sufficient   | High |
| Isihara's Cervical<br>Curvature Index | mJOA<br>Pearson's correlation:<br>0.04; total sample size:<br>235                                                | Sufficient   | High |
|                                       | SF-12 PCS<br>Pearson's correlation:<br>0.06; total sample size:<br>235                                           | Sufficient   | High |
|                                       | SF-12 MCS<br>Pearson's correlation:<br>0.11; total sample size:<br>235                                           |              |      |
|                                       | Pain, "Numeric rating<br>scale" (Arm pain score)<br>Pearson's correlation:<br>-0.28; total sample<br>size: 235   | Sufficient   | High |
|                                       | Pain, "Numeric rating<br>scale" (Neck pain scores)<br>Pearson's correlation:<br>-0.27; total sample<br>size: 235 |              |      |
|                                       | NDI<br>Pearson's correlation:<br>-0.10; total sample<br>size: 235                                                |              |      |
| JOA                                   | mJOA [convergent]                                                                                                | Sufficient   | Low  |



|                |     |                                                                                    |              |          |
|----------------|-----|------------------------------------------------------------------------------------|--------------|----------|
|                |     | Spearman's rank<br>correlation: 0.87; total<br>sample size: 92                     |              |          |
|                |     | JOACMEQ QOL<br>[convergent]                                                        | Sufficient   | Low      |
|                |     | Spearman's rank<br>correlation: 0.41; total<br>sample size: 92                     |              |          |
|                |     | SF-12 PCS                                                                          | Sufficient   | Low      |
|                |     | Spearman's rank<br>correlation: 0.50; total<br>sample size: 92                     |              |          |
|                |     | SF-12 MCS                                                                          | Sufficient   | Low      |
|                |     | Spearman's rank<br>correlation: -0.05; total<br>sample size: 92                    |              |          |
|                |     | NDI                                                                                | Sufficient   | Moderate |
|                |     | Spearman's rank<br>correlation range –<br>0.50 to -0.76; total<br>sample size: 122 |              |          |
| <b>JOACMEQ</b> |     |                                                                                    |              |          |
|                | QOL | NDI                                                                                | Sufficient   | Low      |
|                |     | Spearman's rank<br>correlation: -0.66;<br>total sample size: 92                    |              |          |
|                | QOL | SF-12 PCS                                                                          | Insufficient | Low      |
|                |     | Spearman's rank<br>correlation: 0.29; total<br>sample size: 92                     |              |          |
|                |     | SF-12 MCS                                                                          |              |          |
|                |     | Spearman's rank<br>correlation: 0.40; total<br>sample size: 92                     |              |          |
|                | MDI | Nurick scale [convergent]                                                          | Sufficient   | Low      |
|                |     | Spearman's rank<br>correlation: 0.66; total<br>sample size: 41                     |              |          |

|                      |                                                                                                                                                                  |              |      |
|----------------------|------------------------------------------------------------------------------------------------------------------------------------------------------------------|--------------|------|
| mJOA                 | 30MWT [convergent]<br>Pearson's correlation:<br>−0.38; total sample<br>size: 193                                                                                 | Insufficient | High |
|                      | JOACMEQ QOL<br>[convergent]<br>Spearman's rank<br>correlation: 0.41; total<br>sample size: 92                                                                    | Insufficient | Low  |
|                      | EQ-5D<br>Spearman's rank<br>correlation: 0.42; total<br>sample size: 119                                                                                         | Insufficient | High |
|                      | SF-36 PCS<br>Pearson's correlation<br>range: 0.30–0.30; total<br>sample size: 338<br>SF-12 PCS<br>Spearman's rank<br>correlation: 0.47; total<br>sample size: 92 | Sufficient   | High |
|                      | SF-36 MCS<br>Pearson's correlation:<br>0.25–0.25; total<br>sample size: 338<br>SF-12 MCS<br>Spearman's rank<br>correlation: 0.03; total<br>sample size: 92       | Sufficient   | High |
|                      | NDI<br>Spearman's rank<br>correlation: −0.51; total<br>sample size: 92<br>Pearson's correlation<br>range −0.33 to −0.34;<br>total sample size: 336               | Sufficient   | High |
| Motor<br>dysfunction | 30MWT [convergent]                                                                                                                                               | Insufficient | High |

|                      |                                                                |                    |              |
|----------------------|----------------------------------------------------------------|--------------------|--------------|
| of lower extremities | Pearson's correlation:<br>–0.43; total sample size: 193        |                    |              |
|                      | SF-36 PCS                                                      | Sufficient         | High         |
|                      | Pearson's correlation range: 0.31–0.50; total sample size: 338 |                    |              |
|                      | SF-36 MCS                                                      | Sufficient         | High         |
|                      | Pearson's correlation:<br>0.21; total sample size: 268         |                    |              |
|                      | NDI                                                            | Sufficient         | High         |
|                      | Pearson's correlation:<br>–0.31; total sample size: 261        |                    |              |
|                      | Motor dysfunction of upper extremities                         | 30MWT [convergent] | Insufficient |
|                      | Pearson's correlation:<br>–0.21; total sample size: 193        |                    |              |
|                      | SF-36 PCS                                                      | Insufficient       | High         |
|                      | Pearson's correlation:<br>0.22; total sample size: 268         |                    |              |
|                      | SF-36 MCS                                                      | Sufficient         | High         |
|                      | Pearson's correlation:<br>0.20; total sample size: 268         |                    |              |
|                      | NDI                                                            | Sufficient         | High         |
|                      | Pearson's correlation:<br>–0.24; total sample size: 261        |                    |              |
|                      | Sensory dysfunction of sphincter dysfunction                   | 30MWT [convergent] | Insufficient |
|                      | Pearson's correlation:<br>–0.23; total sample size: 193        |                    |              |
|                      | SF-36 PCS                                                      | Sufficient         | High         |

|                                          |                    |                                                                        |              |      |
|------------------------------------------|--------------------|------------------------------------------------------------------------|--------------|------|
|                                          |                    | Pearson's correlation:<br>0.06; total sample size:<br>268              |              |      |
|                                          |                    | SF-36 MCS<br>Pearson's correlation:<br>0.08; total sample size:<br>268 |              |      |
|                                          | NDI                |                                                                        | Sufficient   | High |
|                                          |                    | Pearson's correlation:<br>-0.16; total sample size: 261                |              |      |
| Sensory dysfunction of upper extremities | 30MWT [convergent] |                                                                        | Insufficient | High |
|                                          |                    | Pearson's correlation:<br>-0.05; total sample size: 193                |              |      |
|                                          | SF-36 PCS          |                                                                        | Sufficient   | High |
|                                          |                    | Pearson's correlation:<br>0.19; total sample size:<br>268              |              |      |
|                                          | SF-36 MCS          |                                                                        |              |      |
|                                          |                    | Pearson's correlation:<br>0.19; total sample size:<br>268              |              |      |
|                                          | NDI                |                                                                        | Insufficient | High |
|                                          |                    | Pearson's correlation:<br>-0.23; total sample size: 261                |              |      |
| NDI                                      | mJOA               |                                                                        | Sufficient   | High |
|                                          |                    | Pearson's correlation:<br>-0.36; total sample size: 235                |              |      |
|                                          | SF-12 PCS          |                                                                        | Sufficient   | High |
|                                          |                    | Pearson's correlation:<br>-0.54; total sample size: 235                |              |      |
|                                          | SF-12 MCS          |                                                                        |              |      |

|                                                       |                                                                   |                                                                  |            |          |
|-------------------------------------------------------|-------------------------------------------------------------------|------------------------------------------------------------------|------------|----------|
|                                                       |                                                                   | Pearson's correlation:<br>-0.40; total sample<br>size: 235       |            |          |
|                                                       | Pain, "Numeric rating<br>scale" (Arm pain score)                  |                                                                  | Sufficient | High     |
|                                                       |                                                                   | Pearson's correlation:<br>0.68; total sample size:<br>235        |            |          |
|                                                       | Pain, "Numeric rating<br>scale" (Neck pain scores)                |                                                                  |            |          |
|                                                       |                                                                   | Pearson's correlation:<br>0.64; total sample size:<br>235        |            |          |
| Nurick scale                                          | EQ-5D                                                             |                                                                  | Sufficient | High     |
|                                                       |                                                                   | Spearman's rank<br>correlation: -0.28; total<br>sample size: 119 |            |          |
| Pain, "Numeric<br>rating scale"<br>(Arm pain scores)  | mJOA                                                              |                                                                  | Sufficient | High     |
|                                                       |                                                                   | Pearson's correlation:<br>-0.19; total sample<br>size: 235       |            |          |
|                                                       | Pain, "Numeric rating<br>scale" (Neck pain score)<br>[convergent] |                                                                  | Sufficient | High     |
|                                                       |                                                                   | Pearson's correlation:<br>0.72; total sample size:<br>235        |            |          |
| Pain, "Numeric<br>rating scale"<br>(Neck pain scores) | mJOA                                                              |                                                                  | Sufficient | High     |
|                                                       |                                                                   | Pearson's correlation:<br>-0.07; total sample<br>size: 235       |            |          |
| QuickDASH                                             | SF-36                                                             |                                                                  | Sufficient | Moderate |
|                                                       |                                                                   | Spearman's rank<br>correlation: -0.75; total<br>sample size: 94  |            |          |
|                                                       | NDI and Pain, "Numeric<br>rating scale" [convergent]              |                                                                  | Sufficient | Moderate |

|              |                                                |                                                                       |            |          |
|--------------|------------------------------------------------|-----------------------------------------------------------------------|------------|----------|
|              |                                                | Spearman's rank correlation range<br>0.69–0.83; total sample size: 94 |            |          |
| <b>SF-12</b> |                                                |                                                                       |            |          |
| MCS          | mJOA                                           | Pearson's correlation:<br>0.19; total sample size:<br>235             | Sufficient | High     |
|              | Pain, "Numeric rating scale" (Arm pain score)  | Pearson's correlation:<br>–0.23; total sample size: 235               | Sufficient | High     |
|              | Pain, "Numeric rating scale" (Neck pain score) | Pearson's correlation:<br>–0.28; total sample size: 235               |            |          |
|              | NDI                                            | Spearman's rank correlation: –0.17; total sample size: 92             | Sufficient | Moderate |
|              | SF-12 PCS                                      | Pearson's correlation:<br>0.01; total sample size:<br>235             | Sufficient | High     |
| PCS          | mJOA                                           | Pearson's correlation:<br>0.43; total sample size:<br>235             | Sufficient | High     |
|              | Pain, "Numeric rating scale" (Arm pain score)  | Pearson's correlation:<br>–0.44; total sample size: 235               | Sufficient | High     |
|              | Pain, "Numeric rating scale" (Neck pain score) |                                                                       |            |          |

|                    |                                                                 |            |          |
|--------------------|-----------------------------------------------------------------|------------|----------|
|                    | Pearson's correlation:<br>-0.41; total sample<br>size: 235      |            |          |
|                    | NDI                                                             | Sufficient | Moderate |
|                    | Spearman's rank<br>correlation: -0.49; total<br>sample size: 92 |            |          |
|                    | SF-12 MCS                                                       | Sufficient | Low      |
|                    | Spearman's rank<br>correlation: -0.29; total<br>sample size: 92 |            |          |
| Triangle step test | Grip-and-release test<br>[convergent]                           | Sufficient | High     |
|                    | Spearman's rank<br>correlation: 0.55; total<br>sample size: 270 |            |          |

\*Instruments listed are comparators

**Supplementary Table 12. Responsiveness.**

| <b>Instrument</b>         | <b>Result summary*</b>                                                                                           | <b>Overall rating</b> | <b>Quality of evidence</b> |
|---------------------------|------------------------------------------------------------------------------------------------------------------|-----------------------|----------------------------|
| 30MWT                     | 30MWT<br>SRM: 0.3; total sample size: 484                                                                        | Insufficient          | High                       |
| BBS                       | mJOA<br>Sensitivity range 77.4-80.0; total sample size: 31<br>Specificity range 87.8-92.9; total sample size: 31 | Sufficient            | Low                        |
| EQ-5D                     | EQ-5D<br>Mean change score: 0.06; total sample size: 108                                                         | Indeterminate         | High                       |
| European Myelopathy Scale | EMS<br>Normalised change: 0.18; total sample size: 99                                                            | Indeterminate         | Very low                   |
| Foot tapping test         | Foot tapping test<br>Mean change score: 6; total sample size: 6                                                  | Indeterminate         | Very low                   |
| Grip-and-release test     | Grip-and-release test<br>Spearman's rank correlation: 0.69; total sample size: 48                                | Sufficient            | Very low                   |
|                           | JOA<br>Spearman's rank correlation: 0.32; total sample size: 48                                                  | Insufficient          | Low                        |
| JOA                       | mJOA<br>Spearman's rank correlation: 0.75; total sample size: 92                                                 | Sufficient            | Very low                   |
|                           | JOA                                                                                                              | Indeterminate         | Very low                   |



|                                |             |                                                                                                                   |               |          |
|--------------------------------|-------------|-------------------------------------------------------------------------------------------------------------------|---------------|----------|
|                                |             | Mean change score<br>range 4.6; total sample<br>size: 126<br>Normalised change:<br>0.21; total sample size:<br>99 |               |          |
|                                |             | JOA MFLE<br>Mean change score<br>range 0.6; total sample<br>size: 126                                             |               |          |
| <b>JOACMEQ</b>                 |             |                                                                                                                   |               |          |
| Bladder<br>function            | JOACMEQ BF  |                                                                                                                   | Sufficient    | Moderate |
|                                |             | AUC: 0.82; total<br>sample size: 78                                                                               |               |          |
|                                | JOACMEQ BF  |                                                                                                                   | Indeterminate | Very low |
|                                |             | Mean change score:<br>18.0; total sample size:<br>87                                                              |               |          |
|                                | JOACMEQ BF  |                                                                                                                   | Insufficient  | Moderate |
|                                |             | Effect size: 0.33; total<br>sample size: 78                                                                       |               |          |
| Cervical<br>spine<br>function  | JOACMEQ CF  |                                                                                                                   | Sufficient    | Moderate |
|                                |             | AUC: 0.72; total<br>sample size: 78                                                                               |               |          |
|                                | JOACMEQ CF  |                                                                                                                   | Indeterminate | Very low |
|                                |             | Mean change score:<br>25.8; total sample size:<br>87                                                              |               |          |
|                                | JOACMEQ CF  |                                                                                                                   | Insufficient  | Moderate |
|                                |             | Effect size: 0.28; total<br>sample size: 78                                                                       |               |          |
| Lower<br>extremity<br>function | JOACMEQ LEF |                                                                                                                   | Sufficient    | Moderate |
|                                |             | AUC: 0.75; total<br>sample size: 78                                                                               |               |          |
|                                | JOACMEQ LEF |                                                                                                                   | Indeterminate | Very low |
|                                |             | Mean change score:<br>28.4; total sample size:<br>87                                                              |               |          |

|                          |                                                    |               |          |
|--------------------------|----------------------------------------------------|---------------|----------|
|                          | JOACMEQ LEF                                        | Insufficient  | Moderate |
|                          | Effect size: 0.02; total sample size: 78           |               |          |
| Upper extremity function | JOACMEQ UEF                                        | Sufficient    | Moderate |
|                          | AUC: 0.74; total sample size: 78                   |               |          |
|                          | JOACMEQ UEF                                        | Indeterminate | Very low |
|                          | Mean change score: 10.7; total sample size: 87     |               |          |
|                          | JOACMEQ UEF                                        | Insufficient  | Moderate |
|                          | Effect size: 0.17; total sample size: 78           |               |          |
| QOL                      | JOACMEQ QOL                                        | Sufficient    | Moderate |
|                          | AUC: 0.83; total sample size: 78                   |               |          |
|                          | JOACMEQ QOL                                        | Indeterminate | Very low |
|                          | Mean change score: 23.7; total sample size: 87     |               |          |
|                          | JOACMEQ QOL                                        | Insufficient  | Moderate |
|                          | Effect size: 0.46; total sample size: 78           |               |          |
| MDI                      | MDI                                                | Indeterminate | Very low |
|                          | Normalised change: 0.52; total sample size: 99     |               |          |
| mJOA                     | mJOA                                               | Sufficient    | High     |
|                          | Effect size range 0.87–1.0; total sample size: 352 |               |          |
|                          | mJOA                                               | Indeterminate | Very low |
|                          | Normalised change: 1.47; total sample size: 42     |               |          |
| NDI                      | Anchor-based approach                              | Insufficient  | Moderate |
|                          | AUC: 0.66; total sample size: 78                   |               |          |

|                                            |                                            |                                                              |               |          |
|--------------------------------------------|--------------------------------------------|--------------------------------------------------------------|---------------|----------|
|                                            |                                            | Effect size: 0.44; total sample size: 78                     |               |          |
|                                            |                                            | NDI                                                          | Indeterminate | Very low |
|                                            |                                            | Mean change score: –15.8; total sample size: 118             |               |          |
| Nurick scale                               | Nurick scale                               | Normalised change: 0.42; total sample size: 99               | Indeterminate | Very low |
|                                            |                                            | Mean change score range –0.76 to –1.3; total sample size: 93 |               |          |
| Ranawat classification of disease severity | Ranawat classification of disease severity | Normalised change: 0.34; total sample size: 99               | Indeterminate | Very low |
| SF-12                                      |                                            |                                                              |               |          |
|                                            | PCS                                        | SF-12 PCS                                                    | Indeterminate | Very low |
|                                            |                                            | Mean change score: 8.17; total sample size: 118              |               |          |
| SF-36                                      |                                            | SF-36                                                        | Indeterminate | Very low |
|                                            |                                            | Normalised change: 0.32; total sample size: 99               |               |          |
|                                            | PCS                                        | SF-36 PCS                                                    | Sufficient    | Low      |
|                                            |                                            | Effect size range: 0.84; total sample size: 142              |               |          |
|                                            |                                            | SF-36 PCS                                                    | Sufficient    | Moderate |
|                                            |                                            | Sensitivity: 0.85; total sample size: 105                    |               |          |
|                                            | MCS                                        | SF-36 MCS                                                    | Sufficient    | Low      |
|                                            |                                            | Effect size range: 0.81; total sample size: 142              |               |          |
|                                            |                                            | SF-36 MCS                                                    | Sufficient    | Moderate |

---

Sensitivity: 0.67; total  
sample size: 105

---

| WHOQOL-Bref |                                             |              |     |
|-------------|---------------------------------------------|--------------|-----|
| PH          | WHOQOL-Bref PH                              | Insufficient | Low |
|             | Effect size: 0.68; total<br>sample size: 38 |              |     |
| PS          | WHOQOL-Bref PS                              | Insufficient | Low |
|             | Effect size: 0.39; total<br>sample size: 38 |              |     |
| SR          | WHOQOL-Bref SR                              | Insufficient | Low |
|             | Effect size: 0.03; total<br>sample size: 38 |              |     |
| EN          | WHOQOL-Bref EN                              | Insufficient | Low |
|             | Effect size: 0.45; total<br>sample size: 38 |              |     |

---

\*Instruments listed are comparators

## REFERENCES

1. Auffinger BM, Lall RR, Dahdaleh NS, Wong AP, Lam SK, Koski T, et al. Measuring surgical outcomes in cervical spondylotic myelopathy patients undergoing anterior cervical discectomy and fusion: assessment of minimum clinically important difference. *PLoS One*. 2013;8(6):e67408.
2. Augusto MT, Diniz JM, Dantas FLR, Oliveira MF, Rotta JM, Botelho RV. Development of the Portuguese Version of the Modified Japanese Orthopaedic Association Score: Cross-Cultural Adaptation, Reliability, Validity, and Responsiveness. *World Neurosurg*. 2018;116:e1092-e7.
3. Azimi P, Rezaei O, Montazeri A. An outcome measure of functionality and quality of life in patients with cervical myelopathy. *Iran Red Crescent Med J*. 2014;16(6):e8102.
4. Badhiwala JH, Witiw CD, Nassiri F, Akbar MA, Jaja B, Wilson JR, et al. Minimum Clinically Important Difference in SF-36 Scores for Use in Degenerative Cervical Myelopathy. *Spine (Phila Pa 1976)*. 2018;43(21):E1260-e6.
5. Bohm PE, Fehlings MG, Kopjar B, Tetreault LA, Vaccaro AR, Anderson KK, et al. Psychometric properties of the 30-m walking test in patients with degenerative cervical myelopathy: results from two prospective multicenter cohort studies. *Spine J*. 2017;17(2):211-7.
6. Carreon LY, Glassman SD, Campbell MJ, Anderson PA. Neck Disability Index, short form-36 physical component summary, and pain scales for neck and arm pain: the minimum clinically important difference and substantial clinical benefit after cervical spine fusion. *Spine J*. 2010;10(6):469-74.
7. Chang H, Kong CG, Won HY, Kim JH, Park JB. Inter- and intra-observer variability of a cervical OPLL classification using reconstructed CT images. *Clin Orthop Surg*. 2010;2(1):8-12.
8. Chiba K, Kato Y, Tsuzuki N, Nagata K, Toyama Y, Iwasaki M, et al. Computer-assisted measurement of the size of ossification in patients with ossification of the posterior longitudinal ligament in the cervical spine. *J Orthop Sci*. 2005;10(5):451-6.
9. Chien A, Lai DM, Cheng CH, Wang SF, Hsu WL, Wang JL. Responsiveness of the Chinese versions of the Japanese Orthopaedic Association Cervical Myelopathy Evaluation Questionnaire and Neck Disability Index in postoperative patients with cervical spondylotic myelopathy. *Spine (Phila Pa 1976)*. 2015;40(17):1315-21.
10. Chiu AY, Pang MY. Assessment of psychometric properties of various balance assessment tools in persons with cervical spondylotic myelopathy. *Journal of orthopaedic & sports physical therapy*. 2017;47(9):673-82.
11. Fukui M, Chiba K, Kawakami M, Kikuchi S, Konno S, Miyamoto M, et al. Japanese Orthopaedic Association Cervical Myelopathy Evaluation Questionnaire (JOACMEQ): Part 2. Endorsement of the alternative item. *J Orthop Sci*. 2007;12(3):241-8.
12. Fukui M, Chiba K, Kawakami M, Kikuchi S, Konno S, Miyamoto M, et al. Japanese Orthopaedic Association Cervical Myelopathy Evaluation Questionnaire: part 3. Determination of reliability. *J Orthop Sci*. 2007;12(4):321-6.
13. Goyal DKC, Murphy HA, Hollern DA, Divi SN, Nicholson K, Stawicki C, et al. Is the Neck Disability Index an Appropriate Measure for Changes in Physical Function After Surgery for Cervical Spondylotic Myelopathy? *Int J Spine Surg*. 2020;14(1):53-8.
14. Gwinn DE, Iannotti CA, Benzel EC, Steinmetz MP. Effective lordosis: analysis of sagittal spinal canal alignment in cervical spondylotic myelopathy. *J Neurosurg Spine*. 2009;11(6):667-72.

15. Hosono N, Sakaura H, Mukai Y, Kaito T, Makino T, Yoshikawa H. A simple performance test for quantifying the severity of cervical myelopathy. *J Bone Joint Surg Br.* 2008;90(9):1210-3.
16. Hosono N, Takenaka S, Mukai Y, Makino T, Sakaura H, Miwa T, et al. Postoperative 24-hour result of 15-second grip-and-release test correlates with surgical outcome of cervical compression myelopathy. *Spine (Phila Pa 1976).* 2012;37(15):1283-7.
17. Kang Y, Lee JW, Koh YH, Hur S, Kim SJ, Chai JW, et al. New MRI grading system for the cervical canal stenosis. *AJR Am J Roentgenol.* 2011;197(1):W134-40.
18. Kato S, Oshima Y, Oka H, Chikuda H, Takeshita Y, Miyoshi K, et al. Comparison of the Japanese Orthopaedic Association (JOA) score and modified JOA (mJOA) score for the assessment of cervical myelopathy: a multicenter observational study. *PloS one.* 2015;10(4):e0123022.
19. Kato S, Oshima Y, Matsubayashi Y, Taniguchi Y, Tanaka S, Takeshita K. Minimum Clinically Important Difference and Patient Acceptable Symptom State of Japanese Orthopaedic Association Score in Degenerative Cervical Myelopathy Patients. *Spine (Phila Pa 1976).* 2019;44(10):691-7.
20. Kato S, Oshima Y, Matsubayashi Y, Taniguchi Y, Tanaka S, Takeshita K. Minimum clinically important difference in outcome scores among patients undergoing cervical laminoplasty. *Eur Spine J.* 2019;28(5):1234-41.
21. King JT, Jr., Roberts MS. Validity and reliability of the Short Form-36 in cervical spondylotic myelopathy. *J Neurosurg.* 2002;97(2 Suppl):180-5.
22. Ko S, Choi W, Chae S. Comparison of inter- and intra-observer reliability among the three classification systems for cervical spinal canal stenosis. *Eur Spine J.* 2017;26(9):2290-6.
23. Kopjar B, Tetreault L, Kalsi-Ryan S, Fehlings M. Psychometric properties of the modified Japanese Orthopaedic Association scale in patients with cervical spondylotic myelopathy. *Spine (Phila Pa 1976).* 2015;40(1):E23-8.
24. Latimer M, Haden N, Seeley HM, Laing RJ. Measurement of outcome in patients with cervical spondylotic myelopathy treated surgically. *Br J Neurosurg.* 2002;16(6):545-9.
25. Longo UG, Berton A, Denaro L, Salvatore G, Denaro V. Development of the Italian version of the modified Japanese orthopaedic association score (mJOA-IT): cross-cultural adaptation, reliability, validity and responsiveness. *Eur Spine J.* 2016;25(9):2952-7.
26. Lubelski D, Alvin MD, Nesterenko S, Sundar SJ, Thompson NR, Benzel EC, et al. Correlation of quality of life and functional outcome measures for cervical spondylotic myelopathy. *Journal of Neurosurgery: Spine.* 2016;24(3):483-9.
27. Mihara H, Kondo S, Murata A, Ishida K, Niimura T, Hachiya M. A new performance test for cervical myelopathy: the triangle step test. *Spine (Phila Pa 1976).* 2010;35(1):32-5.
28. Nakamoto H, Oshima Y, Takeshita K, Chikuda H, Ono T, Taniguchi Y, et al. Usefulness of QuickDASH in patients with cervical laminoplasty. *J Orthop Sci.* 2014;19(2):218-22.
29. Nakashima H, Yukawa Y, Ito K, Machino M, Kanbara S, Morita D, et al. Validity of the 10-s step test: prospective study comparing it with the 10-s grip and release test and the 30-m walking test. *Eur Spine J.* 2011;20(8):1318-22.
30. Nicholson KJ, Millhouse PW, Pflug E, Woods B, Schroeder GD, Anderson DG, et al. Cervical Sagittal Range of Motion as a Predictor of Symptom Severity in Cervical Spondylotic Myelopathy. *Spine (Phila Pa 1976).* 2018;43(13):883-9.
31. Nikaido T, Kikuchi S, Yabuki S, Otani K, Konno S. Surgical treatment assessment using the Japanese orthopedic association cervical myelopathy evaluation questionnaire in patients

- with cervical myelopathy: a new outcome measure for cervical myelopathy. *Spine (Phila Pa 1976)*. 2009;34(23):2568-72.
32. Numasawa T, Ono A, Wada K, Yamasaki Y, Yokoyama T, Aburakawa S, et al. Simple foot tapping test as a quantitative objective assessment of cervical myelopathy. *Spine (Phila Pa 1976)*. 2012;37(2):108-13.
  33. Olindo S, Signate A, Richech A, Cabre P, Catonne Y, Smadja D, et al. Quantitative assessment of hand disability by the Nine-Hole-Peg test (9-HPT) in cervical spondylotic myelopathy. *Journal of Neurology, Neurosurgery & Psychiatry*. 2008;79(8):965-7.
  34. Park H-J, Kim SS, Chung E-C, Lee S-Y, Park N-H, Rho M-H, et al. Clinical correlation of a new practical MRI method for assessing cervical spinal canal compression. *American Journal of Roentgenology*. 2012;199(2):W197-W201.
  35. Pratali RR, Smith JS, Motta RL, Martins SM, Motta MM, Rocha RD, et al. A Brazilian Portuguese cross-cultural adaptation of the modified JOA scale for myelopathy. *Clinics*. 2017;72:103-5.
  36. Pratali RR, Smith JS, Rocha RD, Matos TD, Defino HLA, Herrero C. RELIABILITY OF A BRAZILIAN PORTUGUESE TRANSLATED AND CROSS-CULTURALLY ADAPTED VERSION OF THE MJOA SCALE. *Acta Ortop Bras*. 2018;26(5):335-7.
  37. Rhee JM, Shi WJ, Cyriac M, Kim JY, Zhou F, Easley KA, et al. The P-mJOA: A Patient-derived, Self-reported Outcome Instrument for Evaluating Cervical Myelopathy: Comparison with the mJOA. *Clin Spine Surg*. 2018;31(2):E115-e20.
  38. Sato T, Horikoshi T, Watanabe A, Uchida M, Ishigame K, Araki T, et al. Evaluation of cervical myelopathy using apparent diffusion coefficient measured by diffusion-weighted imaging. *AJNR Am J Neuroradiol*. 2012;33(2):388-92.
  39. Shim E, Lee JW, Lee E, Kang Y, Kang HS, Kang WY, et al. Cervical spondylotic myelopathy: diagnostic performance of radiologists with varying levels of experience in comparing MR images acquired using field strengths of 1.5 and 3 Tesla. *Acta Radiol*. 2019;60(10):1314-20.
  40. Singh A, Crockard HA. Comparison of seven different scales used to quantify severity of cervical spondylotic myelopathy and post-operative improvement. *J Outcome Meas*. 2001;5(1):798-818.
  41. Singh A, Crockard HA. Quantitative assessment of cervical spondylotic myelopathy by a simple walking test. *Lancet*. 1999;354(9176):370-3.
  42. Singh A, Gnanalingham K, Casey A, Crockard A. Quality of life assessment using the Short Form-12 (SF-12) questionnaire in patients with cervical spondylotic myelopathy: comparison with SF-36. *Spine (Phila Pa 1976)*. 2006;31(6):639-43.
  43. Spurgas MP, Abbas SF, Szewczyk BS, Yim B, Ata A, German JW. The effect of length of follow-up on substantial clinical benefit thresholds in patients undergoing surgery for cervical degenerative myelopathy. *Journal of Clinical Neuroscience*. 2019;62:88-93.
  44. Tetreault L, Nouri A, Kopjar B, Côté P, Fehlings MG. The Minimum Clinically Important Difference of the Modified Japanese Orthopaedic Association Scale in Patients with Degenerative Cervical Myelopathy. *Spine (Phila Pa 1976)*. 2015;40(21):1653-9.
  45. Thakar S, Rajshekhar V. Evaluation of pain as a preference-based health status measure in patients with cervical spondylotic myelopathy undergoing central corpectomy. *Acta Neurochir (Wien)*. 2012;154(2):335-40.
  46. Thakar S, Christopher S, Rajshekhar V. Quality of life assessment after central corpectomy for cervical spondylotic myelopathy: comparative evaluation of the 36-Item Short

Form Health Survey and the World Health Organization Quality of Life-Bref. *J Neurosurg Spine*. 2009;11(4):402-12.

47. Wada E, Fukui M, Takahashi K, Takeuchi D, Hashizume H, Kanamori M, et al. Japanese orthopaedic association cervical myelopathy evaluation questionnaire (JOACMEQ): Part 5. Determination of responsiveness. *Journal of Orthopaedic Science*. 2019;24(1):57-61.

48. Witayakom W, Paholpak P, Jirattaphochai K, Kosuwon W, Sirichativapee W, Wisanuyotin T, et al. Validation of the reliability of the Thai version of the Japanese Orthopaedic Association Cervical Myelopathy Evaluation Questionnaire (JOACMEQ). *Journal of Orthopaedic Science*. 2016;21(2):124-7.

49. Yonenobu K, Abumi K, Nagata K, Taketomi E, Ueyama K. Interobserver and intraobserver reliability of the Japanese orthopaedic association scoring system for evaluation of cervical compression myelopathy. *Spine (Phila Pa 1976)*. 2001;26(17):1890-4; discussion 5.

50. Yukawa Y, Kato F, Ito K, Horie Y, Nakashima H, Masaaki M, et al. "Ten second step test" as a new quantifiable parameter of cervical myelopathy. *Spine (Phila Pa 1976)*. 2009;34(1):82-6.

51. Zhang Y, Zhou F, Sun Y. Assessment of health-related quality of life using the SF-36 in Chinese cervical spondylotic myelopathy patients after surgery and its consistency with neurological function assessment: a cohort study. *Health Qual Life Outcomes*. 2015;13(1):1-7.

52. Zhou F, Zhang Y, Sun Y, Zhang F, Pan S, Liu Z. Assessment of the minimum clinically important difference in neurological function and quality of life after surgery in cervical spondylotic myelopathy patients: a prospective cohort study. *Eur Spine J*. 2015;24(12):2918-23.
